# Supplementary material
Source: PubMed Central journal article supplement (PMC7931141)
Supplement: jamacardiol-e207434-s001.pdf [file jamacardiol-e207434-s001.pdf]

## Supplemental Online Content

Romeo JLR, Papageorgiou G, da Costa FFD, et al. Long-term clinical and echocardiographic outcomes in young and middle-aged adults undergoing the Ross procedure. *JAMA Cardiol*. Published online March 3, 2021. doi:10.1001/jamacardio.2020.7434

**eTable 1.** Baseline and surgical characteristics per center

**eTable 2.** Risk factor analysis by penalized Cox regression: All-cause mortality

**eTable 3.** Risk factor analysis by penalized Cox regression: Cardiac mortality

**eTable 4.** Risk factor analysis by penalized Cox regression: Freedom from any reintervention

**eTable 5.** Risk factor analysis by penalized Cox regression: Freedom from autograft reintervention

**eTable 6.** Risk factor analysis by penalized Cox regression: Freedom from homograft reintervention

**eTable 7.** Model Coefficients for peak autograft gradient

**eTable 8.** Odds Ratios, 95% CIs and Univariate Wald tests of covariates with autograft regurgitation

**eTable 9.** Model Coefficients for peak homograft gradient

**eTable 10.** Odds Ratios, 95% CIs and Univariate Wald tests of covariates with homograft regurgitation

**eFigure 1.** Kaplan-Meier plots of overall reintervention per country

**eFigure 2.** Kaplan-Meier plots of autograft reintervention per country

**eFigure 3.** Kaplan-Meier plots of homograft reintervention per country

**eFigure 4.** Effect plots of Autograft gradient and homograft gradient

**eFigure 5.** Effect plot of Autograft regurgitation and homograft regurgitation

**eAppendix 1.** List of participating centers

**eAppendix 2.** In depth description of the statistical analysis

This supplemental material has been provided by the authors to give readers additional information about their work.

**Table e1. Baseline and surgical characteristics per center**

|                                             |             | Australia             | Belgium    | Brazil     | Canada    | Germany    |
|---------------------------------------------|-------------|-----------------------|------------|------------|-----------|------------|
|                                             |             | Average ± sd or n (%) |            |            |           |            |
| Patients (n)                                | 1431        | 201                   | 174        | 316        | 112       | 628        |
| Age (years)                                 | 47.7 ± 9.5  | 50.6±6.4              | 48.8±5.1   | 49.3±6.1   | 53.0±6.2  | 44.7±11.9  |
| <20                                         | 20          | 0 (0)                 | 0 (0)      | 0 (0)      | 0 (0)     | 20 (3.2)   |
| 20 – 40                                     | 192         | 1 (0.5)               | 1 (0.6)    | 2 (0.6)    | 0 (0)     | 188 (29.9) |
| 40 – 60                                     | 1114        | 183 (91.0)            | 170 (97.7) | 295 (97.7) | 98 (87.5) | 368 (58.6) |
| >60                                         | 105         | 17 (8.5)              | 3 (1.7)    | 19 (1.7)   | 14 (12.5) | 52 (8.3)   |
| Males (n)                                   | 1064 (74.3) | 133 (66.2)            | 132 (75.9) | 231 (73.1) | 91 (81.3) | 477 (76.0) |
| NYHA classification (n = 1426)              |             |                       |            |            |           |            |
| I                                           | 373 (26.1)  | 22 (11.0)             | 46 (26.4)  | 101 (32.3) | 17 (15.2) | 187 (29.8) |
| II                                          | 724 (50.8)  | 134 (67.0)            | 77 (44.3)  | 138 (44.1) | 51 (45.5) | 324 (51.7) |
| III                                         | 315 (22.1)  | 42 (21.0)             | 49 (28.2)  | 67 (21.4)  | 44 (39.3) | 113 (18.0) |
| IV                                          | 14 (1.0)    | 2 (1.0)               | 2 (1.1)    | 7 (2.2)    | 0 (0)     | 3 (0.5)    |
| Hypertension (n=1167)                       | 374 (32.0)  | NA                    | 46 (41.4)  | 83 (26.3)  | 40 (35.7) | 205 (32.6) |
| Diabetes (n=1055)                           | 43 (4.1)    | NA                    | NA         | 6 (1.9)    | 8 (7.2)   | 29 (4.6)   |
| Coronary artery disease (n= 1056)           | 52 (4.9)    | NA                    | NA         | 3 (0.9)    | 12 (10.7) | 37 (5.9)   |
| Chronic obstructive lung disease (n = 1056) | 21 (2.0)    | NA                    | NA         | 2 (0.6)    | 7 (6.3)   | 12 (1.9)   |
| Congestive heart failure (n=1230)           | 15 (1.2)    | NA                    | 5 (2.9)    | 1 (2.9)    | 3 (2.7)   | 6 (1.0)    |
| Dyslipidemia (n = 1056)                     | 223         | NA                    | NA         | 62 (19.6)  | 37 (33.0) | 124 (19.7) |
| Peripheral arterial disease (n = 1056)      | 5 (0.5)     | NA                    | NA         | 1 (0.3)    | 1 (0.9)   | 3 (0.5)    |
| Aortic valve morphology (n=1022)            |             | NA                    | NA         |            |           |            |
| Bicuspid                                    | 778 (76.1)  |                       |            | 238 (81.5) | 83 (74.1) | 457 (74.0) |
| Tricuspid                                   | 191 (18.7)  |                       |            | 38 (13.0)  | 13 (11.6) | 140 (22.6) |
| Other/prosthetic                            | 53 (5.2)    |                       |            | 16 (0.5)   | 16 (14.3) | 21 (3.4)   |
| Concomitant procedures                      |             |                       |            |            |           |            |
| CABG (n = 1230)                             | 45 (3.7)    | NA                    | 14 (8.0)   | 3 (0.9)    | 12 (10.7) | 16 (2.5)   |
| Previous cardiac surgery                    | 85 (5.9)    | 8 (4.0)               | 22 (12.6)  | 13 (4.1)   | 10 (8.9)  | 32 (5.1)   |
| Echocardiographic                           |             |                       |            |            |           |            |
| LVEDD (mm) (n=1198)                         | 53±9.5      | 52.4±8.5              | 54.6±8.1   | 53.9±10.0  | 50.6±7.4  | 53.6±10.3  |
| LVESD (mm) (n=1127)                         | 34±8.5      | 33.4±7.7              | 34.2±7.6   | 34.9±8.8   | 32.7±7.8  | 33.6±8.9   |
| LVEF (%) (n=967)                            | 66±11.5     | NA                    | 63.8±9.0   | 70.4±14.2  | 61.4±7.0  | 65.5±10.6  |
| Aorta valve Peak Gradient (mmHg)            | 70±33       | NA                    | 78.1±32.4  | 76.2±26.5  | 73.6±35.0 | 64.0±35.0  |
| Aorta valve Mean Gradient (mmHg)            | 44±21       | 49.8±16.6             | 51.7±20.9  | 48.3±16.6  | 48.3±20.3 | 37.2±21.8  |
| Aortic valve regurgitation (n = 1117)       |             | NA                    |            |            |           |            |
| Aortic regurgitation – no                   | 141 (12.6)  |                       | 53 (30.5)  | 17 (6.3)   | 21 (19.1) | 50 (8.9)   |
| Aortic regurgitation – trace                | 363 (32.5)  |                       | 31 (17.8)  | 132 (48.9) | 51 (46.3) | 148 (26.3) |
| Aortic regurgitation – mild                 | 237 (21.2)  |                       | 36 (20.7)  | 52 (19.3)  | 21 (19.1) | 128 (22.7) |
| Aortic regurgitation – moderate             | 278 (24.9)  |                       | 48 (27.6)  | 0 (0)      | 11 (10.0) | 219 (38.9) |
| Aortic regurgitation – severe               | 98 (8.8)    |                       | 6 (3.4)    | 69 (25.5)  | 6 (5.5)   | 18 (3.2)   |
| Technique (n=1427)                          |             |                       |            |            |           |            |
| Root inclusion                              | 355 (24.9)  | 199 (99.0)            | 82 (47.1)  | 41 (13.1)  | 0 (0)     | 33 (5.3)   |
| Root replacement                            | 485 (34.0)  | 1 (0.5)               | 86 (49.4)  | 271 (87.9) | 112 (100) | 15 (2.4)   |
| Subcoronary                                 | 587 (41.1)  | 1 (0.5)               | 6 (3.5)    | 0 (0)      | 0 (0)     | 580 (93.3) |
| CPB time (min) (n=1313)                     | 198 ± 41    | 198±22                | 154±33     | 182±41     | 214±39    | 218±34     |
| Cross-clamp time (min) (n=1313)             | 173 ± 36    | 172±20                | 126±19     | 165±26     | 187±28    | 181±32     |
| RVOT Conduit (n = 1206)                     |             | NA                    |            |            |           |            |
| Homograft                                   | 1189 (98.6) |                       | 161 (92.5) | 292 (100)  | 112 (100) | 624 (99.4) |
| Pulmonary                                   | 1185 (99.7) |                       | 161 (100)  | 289 (99.0) | 112 (100) | 623 (99.8) |
| Aortic                                      | 4 (0.3)     |                       | 0 (0)      | 3 (1.0)    | 0 (0)     | 1 (0.2)    |
| Bioprosthesis                               | 17 (1.4)    |                       | 13 (7.5)   | 0 (0)      | 0 (0)     | 4 (0.6)    |
| In hospital mortality                       | 10 (0.7%)   | 0 (0)                 | 4 (2.3)    | 1 (0.3)    | 2 (1.8)   | 3 (0.5)    |

Abbreviations: CABG, coronary artery bypass grafting; CPB, cardio-pulmonary bypass; NYHA, New York Heart Association

**Table e2. Risk factor analysis by penalized Cox regression: All-cause mortality**

| Factor                                | HR   | 95% CI        | P-value |
|---------------------------------------|------|---------------|---------|
| Age at operation (years)              | 1.06 | (1.05; 1.08)  | 0.00    |
| Sex (female)                          | 1.42 | (1.01; 2.01)  | 0.05    |
| Weight at operation (kg)              | 1.01 | (0.99; 1.04)  | 0.32    |
| Previous cardiac surgery              | 1.86 | (0.74; 4.70)  | 0.19    |
| NYHA classification                   | 1.39 | (1.02; 1.89)  | 0.04    |
| Tricuspid aortic valve                | 0.88 | (0.35; 2.19)  | 0.78    |
| Rheumatic heart disease               | 0.92 | (0.25; 3.43)  | 0.90    |
| Prosthetic valve in aortic position   | 0.15 | (0.02; 1.24)  | 0.08    |
| Degenerative valve disease            | 1.08 | (0.75; 1.54)  | 0.69    |
| Active aortic valve endocarditis      | 0.82 | (0.17; 4.03)  | 0.81    |
| Resolved aortic valve endocarditis    | 0.28 | (0.05; 1.65)  | 0.16    |
| Hypertension                          | 0.91 | (0.70; 1.18)  | 0.48    |
| Coronary artery disease               | 1.51 | (0.80; 2.82)  | 0.20    |
| Peripheral artery disease             | 9.42 | (3.92; 22.63) | 0.00    |
| Dyslipidemia                          | 0.97 | (0.58; 1.63)  | 0.92    |
| Chronic obstructive pulmonary disease | 5.06 | (2.59; 9.88)  | 0.00    |
| Congenital heart disease              | 1.92 | (1.16; 3.20)  | 0.01    |
| Peak aortic valve gradient (mmHg)     | 1.00 | (0.97; 1.03)  | 0.99    |
| Mean aortic valve gradient (mmHg)     | 0.98 | (0.93; 1.03)  | 0.46    |
| Aortic valve regurgitation - trace    | 0.63 | (0.12; 3.34)  | 0.59    |
| Aortic valve regurgitation – mild     | 0.71 | (0.29; 1.76)  | 0.46    |
| Aortic valve regurgitation – moderate | 0.77 | (0.26; 2.24)  | 0.63    |
| Aortic valve regurgitation – severe   | 0.69 | (0.15; 3.19)  | 0.64    |
| Root replacement technique*           | 0.56 | (0.21; 0.56)  | 0.26    |
| Subcoronary implantation technique*   | 1.16 | (0.75; 1.79)  | 0.51    |
| Homograft (instead of biosprosthesis) | 1.30 | (0.50; 3.40)  | 0.59    |
| Age of homograft donor (years)        | 1.00 | (0.98; 1.02)  | 0.91    |
| Sex of homograft donor (female)       | 0.84 | (0.53; 1.33)  | 0.49    |
| Homograft diameter (mm)               | 0.97 | (0.88; 1.08)  | 0.61    |
| Homograft cryopreservation            | 0.64 | (0.26; 1.61)  | 0.35    |

Abbreviation: NYHA, New York Heart Association

\* as compared with the root-inclusion technique

**Table e3. Risk factor analysis by penalized Cox regression: Cardiac mortality**

| Factor                                | HR    | 95% CI        | P-value |
|---------------------------------------|-------|---------------|---------|
| Age at operation (years)              | 1.05  | (1.02; 1.01)  | <0.01   |
| Sex (female)                          | 2.00  | (1.34; 3.01)  | <0.01   |
| Weight at operation (kg)              | 1.02  | (0.99; 1.05)  | 0.16    |
| Previous cardiac surgery              | 2.50  | (1.31; 4.75)  | 0.01    |
| NYHA classification                   | 1.37  | (0.69; 2.72)  | 0.36    |
| Tricuspid aortic valve                | 1.53  | (0.48; 4.94)  | 0.48    |
| Rheumatic heart disease               | 0.02  | (0.01; 0.09)  | <0.01   |
| Prosthetic valve in aortic position   | 0.01  | (0.00; 0.11)  | <0.01   |
| Degenerative valve disease            | 0.96  | (0.35; 2.62)  | 0.94    |
| Active aortic valve endocarditis      | 2.36  | (0.51; 10.99) | 0.27    |
| Resolved aortic valve endocarditis    | 0.74  | (0.10; 5.49)  | 0.77    |
| Hypertension                          | 0.57  | (0.39; 0.82)  | <0.01   |
| Coronary artery disease               | 2.20  | (1.36; 3.57)  | <0.01   |
| Peripheral artery disease             | 0.13  | (0.03; 0.67)  | 0.01    |
| Dyslipidemia                          | 1.26  | (0.62; 2.55)  | 0.52    |
| Chronic obstructive pulmonary disease | 8.15  | (1.61; 41.14) | 0.01    |
| Congenital heart disease              | 10.06 | (5.14; 19.71) | <0.01   |
| Peak aortic valve gradient (mmHg)     | 1.017 | (0.96; 1.08)  | 0.60    |
| Mean aortic valve gradient (mmHg)     | 0.95  | (0.86; 1.057) | 0.36    |
| Aortic valve regurgitation - trace    | 1.76  | (0.24; 12.76) | 0.58    |
| Aortic valve regurgitation – mild     | 0.79  | (0.12; 5.25)  | 0.81    |
| Aortic valve regurgitation – moderate | 0.69  | (0.08; 6.04)  | 0.74    |
| Aortic valve regurgitation – severe   | 1.66  | (0.13; 21.73) | 0.70    |
| Root replacement technique*           | 0.49  | (0.22; 1.079) | 0.08    |
| Subcoronary implantation technique*   | 0.98  | (0.43; 2.24)  | 0.96    |
| Homograft (instead of biosprosthesis) | 11.26 | (2.30; 55.18) | <0.01   |
| Age of homograft donor (years)        | 1.03  | (0.97; 1.102) | 0.29    |
| Sex of homograft donor (female)       | 0.95  | (0.45; 1.98)  | 0.89    |
| Homograft diameter (mm)               | 0.90  | (0.75; 1.08)  | 0.27    |
| Homograft cryopreservation            | 5.34  | (0.55; 51.51) | 0.15    |

Abbreviation: NYHA, New York Heart Association

\* as compared with the root-inclusion technique

**Table e4. Risk factor analysis by penalized Cox regression: Freedom from any reintervention**

| Factor                                | HR   | 95% CI       | P-value |
|---------------------------------------|------|--------------|---------|
| Age at operation (years)              | 1.01 | (0.99; 1.03) | 0.33    |
| Sex (female)                          | 0.62 | (0.48; 0.79) | <0.01   |
| Weight at operation (kg)              | 1.00 | (0.99; 1.01) | 0.37    |
| Previous cardiac surgery              | 1.09 | (0.48; 2.48) | 0.85    |
| NYHA classification                   | 1.02 | (0.78; 1.35) | 0.86    |
| Tricuspid aortic valve                | 0.93 | (0.51; 1.67) | 0.80    |
| Rheumatic heart disease               | 0.06 | (0.00; 1.79) | 0.11    |
| Prosthetic valve in aortic position   | 0.02 | (0.00; 0.38) | 0.01    |
| Degenerative valve disease            | 1.01 | (0.35; 2.90) | 0.99    |
| Active aortic valve endocarditis      | 0.49 | (0.05; 4.53) | 0.53    |
| Resolved aortic valve endocarditis    | 0.21 | (0.02; 1.89) | 0.16    |
| Hypertension                          | 1.10 | (0.56; 2.12) | 0.79    |
| Coronary artery disease               | 1.21 | (0.85; 1.71) | 0.29    |
| Peripheral artery disease             | 0.03 | (0.00; 0.17) | 0.000   |
| Dyslipidemia                          | 0.73 | (0.38; 1.39) | 0.34    |
| Chronic obstructive pulmonary disease | 0.03 | (0.01; 0.18) | <0.01   |
| Congenital heart disease              | 3.61 | (2.37; 5.80) | <0.01   |
| Peak aortic valve gradient (mmHg)     | 1.00 | (0.96; 1.05) | 0.88    |
| Mean aortic valve gradient (mmHg)     | 0.99 | (0.92; 1.06) | 0.68    |
| Aortic valve regurgitation - trace    | 1.14 | (0.66; 1.95) | 0.65    |
| Aortic valve regurgitation – mild     | 1.19 | (0.58; 2.45) | 0.63    |
| Aortic valve regurgitation – moderate | 1.76 | (0.92; 3.39) | 0.09    |
| Aortic valve regurgitation – severe   | 3.08 | (1.26; 7.52) | 0.01    |
| Root replacement technique*           | 0.97 | (0.51; 1.82) | 0.92    |
| Subcoronary implantation technique*   | 0.81 | (0.46; 1.42) | 0.46    |
| Homograft (instead of biosprosthesis) | 1.40 | (0.78; 2.48) | 0.26    |
| Age of homograft donor (years)        | 0.99 | (0.97; 1.02) | 0.60    |
| Sex of homograft donor (female)       | 0.72 | (0.39; 1.32) | 0.29    |
| Homograft diameter (mm)               | 0.90 | (0.74; 1.10) | 0.31    |
| Homograft cryopreservation            | 1.42 | (0.64; 3.13) | 0.38    |

Abbreviation: NYHA, New York Heart Association

\* as compared with the root-inclusion technique

**Table e5. Risk factor analysis by penalized Cox regression: Freedom from autograft reintervention**

| Factor                                | HR   | 95% CI       | P-value |
|---------------------------------------|------|--------------|---------|
| Age at operation (years)              | 1.01 | (0.99; 1.04) | 0.25    |
| Sex (female)                          | 0.66 | (0.45; 0.98) | 0.04    |
| Weight at operation (kg)              | 1.00 | (0.98; 1.01) | 0.81    |
| Previous cardiac surgery              | 1.23 | (0.51; 2.90) | 0.67    |
| NYHA classification                   | 0.67 | (0.51; 0.87) | <0.01   |
| Tricuspid aortic valve                | 1.25 | (0.62; 2.50) | 0.54    |
| Rheumatic heart disease               | 0.06 | (0.00; 1.50) | 0.09    |
| Prosthetic valve in aortic position   | 0.02 | (0.00; 0.44) | 0.01    |
| Degenerative valve disease            | 1.10 | (0.30; 4.02) | 0.89    |
| Active aortic valve endocarditis      | 0.67 | (0.09; 5.00) | 0.70    |
| Resolved aortic valve endocarditis    | 0.13 | (0.02; 1.13) | 0.07    |
| Hypertension                          | 1.09 | (0.52; 2.30) | 0.82    |
| Coronary artery disease               | 1.27 | (0.74; 2.18) | 0.38    |
| Peripheral artery disease             | 0.03 | (0.00; 0.27) | <0.01   |
| Dyslipidemia                          | 0.44 | (0.29; 0.66) | <0.01   |
| Chronic obstructive pulmonary disease | 0.05 | (0.01; 0.35) | <0.01   |
| Congenital heart disease              | 5.19 | (2.93; 9.18) | <0.01   |
| Peak aortic valve gradient (mmHg)     | 1.01 | (0.96; 1.06) | 0.78    |
| Mean aortic valve gradient (mmHg)     | 0.97 | (0.90; 1.05) | 0.41    |
| Aortic valve regurgitation - trace    | 1.12 | (0.58; 2.18) | 0.74    |
| Aortic valve regurgitation – mild     | 1.34 | (0.60; 3.00) | 0.48    |
| Aortic valve regurgitation – moderate | 1.44 | (0.59; 3.56) | 0.43    |
| Aortic valve regurgitation – severe   | 3.06 | (1.02; 9.22) | 0.05    |
| Root replacement technique*           | 0.66 | (0.36; 1.20) | 0.17    |
| Subcoronary implantation technique*   | 0.44 | (0.25; 0.77) | <0.01   |
| Homograft (instead of biosprosthesis) | 1.28 | (0.65; 2.43) | 0.50    |
| Age of homograft donor (years)        | 1.00 | (0.97; 1.03) | 0.91    |
| Sex of homograft donor (female)       | 0.79 | (0.38; 1.66) | 0.53    |
| Homograft diameter (mm)               | 0.92 | (0.77; 1.04) | 0.17    |
| Homograft cryopreservation            | 1.40 | (0.66; 2.96) | 0.39    |

Abbreviation: NYHA, New York Heart Association

\* as compared with the root-inclusion technique

**Table e6. Risk factor analysis by penalized Cox regression: Freedom from homograft reintervention**

| Factor                                | HR    | 95% CI        | P-value |
|---------------------------------------|-------|---------------|---------|
| Age at operation (years)              | 0.99  | (0.97; 1.00)  | 0.05    |
| Sex (female)                          | 0.43  | (0.19; 0.95)  | 0.04    |
| Weight at operation (kg)              | 0.99  | (0.97; 1.02)  | 0.68    |
| Previous cardiac surgery              | 1.06  | (0.53; 2.11)  | 0.87    |
| NYHA classification                   | 2.08  | (1.66; 2.60)  | <0.01   |
| Tricuspid aortic valve                | 0.57  | (0.14; 2.39)  | 0.44    |
| Rheumatic heart disease               | 0.04  | (0.01; 0.14)  | <0.01   |
| Prosthetic valve in aortic position   | 0.12  | (0.030; 0.47) | <0.01   |
| Degenerative valve disease            | 0.68  | (0.49; 0.95)  | 0.02    |
| Active aortic valve endocarditis      | 0.65  | (0.31; 1.35)  | 0.25    |
| Resolved aortic valve endocarditis    | 0.82  | (0.40; 1.70)  | 0.60    |
| Hypertension                          | 1.43  | (0.96; 2.15)  | 0.08    |
| Coronary artery disease               | 0.90  | (0.60; 1.36)  | 0.63    |
| Peripheral artery disease             | 0.08  | (0.01; 0.62)  | 0.02    |
| Dyslipidemia                          | 1.49  | (0.94; 2.35)  | 0.09    |
| Chronic obstructive pulmonary disease | 0.07  | (0.01; 0.53)  | 0.01    |
| Congenital heart disease              | 1.35  | (0.38; 4.80)  | 0.65    |
| Peak aortic valve gradient (mmHg)     | 1.00  | (0.97; 1.02)  | 0.77    |
| Mean aortic valve gradient (mmHg)     | 1.01  | (0.96; 1.05)  | 0.77    |
| Aortic valve regurgitation - trace    | 1.42  | (0.81; 2.51)  | 0.22    |
| Aortic valve regurgitation – mild     | 0.69  | (0.36; 1.33)  | 0.27    |
| Aortic valve regurgitation – moderate | 1.15  | (0.58; 2.26)  | 0.69    |
| Aortic valve regurgitation – severe   | 1.30  | (0.28; 6.12)  | 0.74    |
| Root replacement technique*           | 1.45  | (0.33; 6.29)  | 0.62    |
| Subcoronary implantation technique*   | 4.17  | (1.73; 10.05) | <0.01   |
| Homograft (instead of biosprosthesis) | 18.14 | (4.07; 80.76) | <0.01   |
| Age of homograft donor (years)        | 0.97  | (0.94; 0.99)  | 0.01    |
| Sex of homograft donor (female)       | 0.50  | (0.22; 1.13)  | 0.10    |
| Homograft diameter (mm)               | 0.77  | (0.66; 0.90)  | <0.01   |
| Homograft cryopreservation            | 1.55  | (0.19; 12.74) | 0.69    |

Abbreviation: NYHA, New York Heart Association

\* as compared with the root-inclusion technique

**Table e7. Model Coefficients for peak autograft gradient**

| Factor                                | Peak aortic gradient |                |         |
|---------------------------------------|----------------------|----------------|---------|
|                                       | Coefficient          | 95% CI         | P-value |
| Age at operation (years)              | -0.03                | (-0.07; 0.00)  | 0.05    |
| Sex (female)                          | 0.77                 | (0.06; 1.48)   | 0.03    |
| Weight at operation (kg)              | 0.02                 | (0.00; 0.04)   | 0.05    |
| Previous cardiac surgery              | 0.43                 | (-0.93; 1.80)  | 0.53    |
| NYHA classification                   | -0.35                | (-1.08; 0.38)  | 0.35    |
| Tricuspid aortic valve                | 2.22                 | (0.52; 3.91)   | 0.01    |
| Rheumatic heart disease               | -0.49                | (-3.65; 2.66)  | 0.76    |
| Prosthetic valve in aortic position   | -0.830               | (-4.19; 2.53)  | 0.63    |
| Degenerative valve disease            | -0.06                | (-0.84; 0.72)  | 0.88    |
| Active aortic valve endocarditis      | 1.63                 | (-6.75; 10.00) | 0.70    |
| Resolved aortic valve endocarditis    | 2.48                 | (-5.57; 10.52) | 0.55    |
| Hypertension                          | 0.71                 | (0.06; 1.36)   | 0.03    |
| Coronary artery disease               | -1.11                | (-2.43; 0.21)  | 0.10    |
| Peripheral artery disease             | 1.89                 | (-2.96; 6.74)  | 0.44    |
| Dyslipidemia                          | 0.15                 | (-0.57; 0.87)  | 0.68    |
| Chronic obstructive pulmonary disease | -0.07                | (-1.97; 1.83)  | 0.94    |
| Congestive heart failure              | 3.02                 | (-0.57; 6.62)  | 0.10    |
| Peak aortic valve gradient (mmHg)     | 0.08                 | (0.03; 0.12)   | <0.01   |
| Mean aortic valve gradient (mmHg)     | -0.11                | (-0.18; -0.03) | 0.01    |
| Aortic valve regurgitation - trace    | -0.13                | (-1.28; 1.01)  | 0.82    |
| Aortic valve regurgitation – mild     | -0.44                | (-1.64; 0.76)  | 0.47    |
| Aortic valve regurgitation – moderate | -0.64                | (-1.90; 0.62)  | 0.32    |
| Aortic valve regurgitation – severe   | 0.05                 | (-1.80; 1.91)  | 0.95    |
| Timing (elective)                     | -1.23                | (-4.16; 1.71)  | 0.41    |
| Root replacement technique*           | 1.27                 | (-2.23; 4.77)  | 0.48    |
| Subcoronary technique*                | 1.61                 | (-0.88; 4.10)  | 0.20    |
| Homograft (instead of biosprosthesis) | -3.5                 | (-6.05; -1.12) | <0.01   |

Abbreviation: NYHA, New York Heart Association

\* as compared with the root-inclusion technique



**Table e8. Odds Ratios, 95% CI's and Univariate Wald tests of covariates with autograft regurgitation**

| Factor                                | Autograft Regurgitation |              |         |
|---------------------------------------|-------------------------|--------------|---------|
|                                       | Odds ratio              | 95% CI       | P-value |
| Time (years)                          | 1.13                    | (1.11; 1.16) | <.001   |
| Age at operation (years)              | 1.06                    | (1.00; 1.05) | 0.06    |
| Sex (female)                          | 0.81                    | (0.45; 1.44) | 0.47    |
| Weight at operation (kg)              | 0.98                    | (0.97; 1.00) | 0.07    |
| Previous cardiac surgery              | 0.62                    | (0.22; 1.78) | 0.37    |
| NYHA classification                   | 0.47                    | (0.26; 0.83) | 0.01    |
| Tricuspid aortic valve                | 0.63                    | (0.18; 2.25) | 0.48    |
| No bicuspid or tricuspid aortic valve | 0.75                    | (0.20; 2.79) | 0.67    |
| Congenital heart disease              | 0.58                    | (0.19; 1.83) | 0.36    |
| Degenerative valve disease            | 1.96                    | (1.04; 3.67) | 0.04    |
| Endocarditis                          | 0.37                    | (0.16; 0.86) | 0.02    |
| Hypertension                          | 0.88                    | (0.52; 1.49) | 0.63    |
| Mean aortic valve gradient (mmHg)     | 1.00                    | (0.98; 1.01) | 0.79    |
| Aortic valve regurgitation - trace    | 1.50                    | (0.60; 3.74) | 0.38    |
| Aortic valve regurgitation – mild     | 2.26                    | (0.87; 5.86) | 0.09    |
| Aortic valve regurgitation – moderate | 2.72                    | (0.97; 7.64) | 0.06    |
| Aortic valve regurgitation – severe   | 2.11                    | (0.56; 8.03) | 0.27    |
| Dyslipidemia                          | 0.69                    | (0.38; 1.25) | 0.22    |
| Timing (elective)                     | 1.35                    | (0.22; 8.23) | 0.74    |
| Root replacement technique*           | 1.12                    | (0.26; 4.55) | 0.88    |
| Subcoronary technique*                | 0.21                    | (0.03; 1.46) | 0.11    |
| Homograft (instead of bioprosthesis)  | 0.12                    | (0.02; 0.90) | 0.04    |
| Age of homograft donor (years)        | 1.00                    | (0.98; 1.02) | 0.85    |

Abbreviation: NYHA, New York Heart Association

\* as compared with the root-inclusion technique

**Table e9. Model Coefficients for peak homograft gradient**

| Factor                                | Peak pulmonary gradient |                 |         |
|---------------------------------------|-------------------------|-----------------|---------|
|                                       | Coefficient             | 95% CI          | P-value |
| Age at operation (years)              | -1.95                   | (-3.64; -0.25)  | 0.02    |
| Sex (female)                          | 0.07                    | (0.02; 0.13)    | <0.01   |
| Weight at operation (kg)              | -0.13                   | (-3.18; 2.93)   | 0.94    |
| Previous cardiac surgery              | -1.14                   | (-2.77; 0.49)   | 0.17    |
| NYHA classification                   | -1.99                   | (-5.61; 1.63)   | 0.28    |
| Tricuspid aortic valve                | -4.27                   | (-7.88; -0.65)  | 0.02    |
| Rheumatic heart disease               | 1.94                    | (-5.78; 9.67)   | 0.62    |
| Prosthetic valve in aortic position   | -0.61                   | (-2.35; 1.13)   | 0.49    |
| Degenerative valve disease            | -1.20                   | (-17.91; 15.52) | 0.89    |
| Active aortic valve endocarditis      | 2.89                    | (-13.96; 19.75) | 0.74    |
| Resolved aortic valve endocarditis    | 21.64                   | (10.35; 32.93)  | <.01    |
| Hypertension                          | -0.53                   | (-3.41; 2.35)   | 0.72    |
| Coronary artery disease               | -1.15                   | (-10.31; 8.02)  | 0.81    |
| Peripheral artery disease             | 3.88                    | (0.79; 6.98)    | 0.01    |
| Dyslipidemia                          | -1.89                   | (-5.92; 2.17)   | 0.37    |
| Chronic obstructive pulmonary disease | 10.95                   | (6.60; 15.30)   | <.01    |
| Congestive heart failure              | -0.01                   | (-0.11; 0.08)   | 0.80    |
| Peak aortic valve gradient (mmHg)     | 0.07                    | (-0.08; 0.22)   | 0.39    |
| Mean aortic valve gradient (mmHg)     | -1.02                   | (-3.36; 1.32)   | 0.39    |
| Aortic valve regurgitation - trace    | -0.12                   | (-2.61; 2.37)   | 0.92    |
| Aortic valve regurgitation – mild     | -0.66                   | (-3.34; 2.02)   | 0.63    |
| Aortic valve regurgitation – moderate | 1.80                    | (-1.74; 5.33)   | 0.32    |
| Aortic valve regurgitation – severe   | -1.14                   | (-6.21; 3.90)   | 0.66    |
| Timing (elective)                     | -1.45                   | (-5.07; 2.17)   | 0.43    |
| Root replacement technique*           | 1.60                    | (-3.84; 7.05)   | 0.56    |
| Subcoronary technique*                | -5.11                   | (-12.91; 2.69)  | 0.20    |
| Homograft (instead of biosprosthesis) | -2.04                   | (-19.37; 15.28) | 0.87    |

Abbreviation: NYHA, New York Heart Association

\* as compared with the root-inclusion technique

**Table e10. Odds Ratios, 95% CI's and Univariate Wald tests of covariates with homograft regurgitation**

| Factor                                | Homograft Regurgitation |              |         |
|---------------------------------------|-------------------------|--------------|---------|
|                                       | Odds ratio              | 95% CI       | P-value |
| Time (years)                          | 1.16                    | (1.13; 1.19) | <.01    |
| Age at operation (years)              | 0.99                    | (0.97; 1.02) | 0.51    |
| Sex (female)                          | 2.63                    | (1.60; 4.32) | <0.01   |
| Weight (kg)                           | 1.01                    | (0.99; 1.02) | 0.28    |
| Previous cardiac surgery              | 1.52                    | (0.62; 3.76) | 0.36    |
| NYHA classification                   | 0.78                    | (0.48; 1.28) | 0.33    |
| Tricuspid aortic valve                | 0.92                    | (0.31; 2.70) | 0.87    |
| No bicuspid or tricuspid aortic valve | 1.11                    | (0.37; 3.38) | 0.85    |
| Congenital heart disease              | 1.04                    | (0.39; 2.77) | 0.94    |
| Degenerative valve disease            | 2.08                    | (1.21; 3.56) | 0.01    |
| Endocarditis                          | 0.96                    | (0.48; 1.94) | 0.91    |
| Hypertension                          | 0.76                    | (0.49; 1.20) | 0.24    |
| Mean aortic valve gradient (mmHg)     | 0.99                    | (0.98; 1.00) | 0.13    |
| Aortic valve regurgitation - trace    | 0.92                    | (0.42; 2.02) | 0.84    |
| Aortic valve regurgitation – mild     | 1.23                    | (0.54; 2.80) | 0.62    |
| Aortic valve regurgitation – moderate | 0.83                    | (0.34; 2.01) | 0.68    |
| Aortic valve regurgitation – severe   | 1.12                    | (0.36; 3.52) | 0.84    |
| Dyslipidemia                          | 1.85                    | (1.11; 3.07) | 0.02    |
| Timing (elective)                     | 0.65                    | (0.13; 3.22) | 0.60    |
| Root replacement technique*           | 1.73                    | (0.46; 6.47) | 0.42    |
| Subcoronary technique*                | 1.28                    | (0.23; 7.07) | 0.77    |
| Homograft (instead of bioprosthesis)  | 0.05                    | (0.01; 0.29) | <0.01   |
| Age of homograft donor (years)        | 0.97                    | (0.95; 0.99) | <0.01   |

Abbreviation: NYHA, New York Heart Association

\* as compared with the root-inclusion technique

## Supplemental Figures

**Figure e1. Kaplan-Meier plots of overall reintervention per country.**

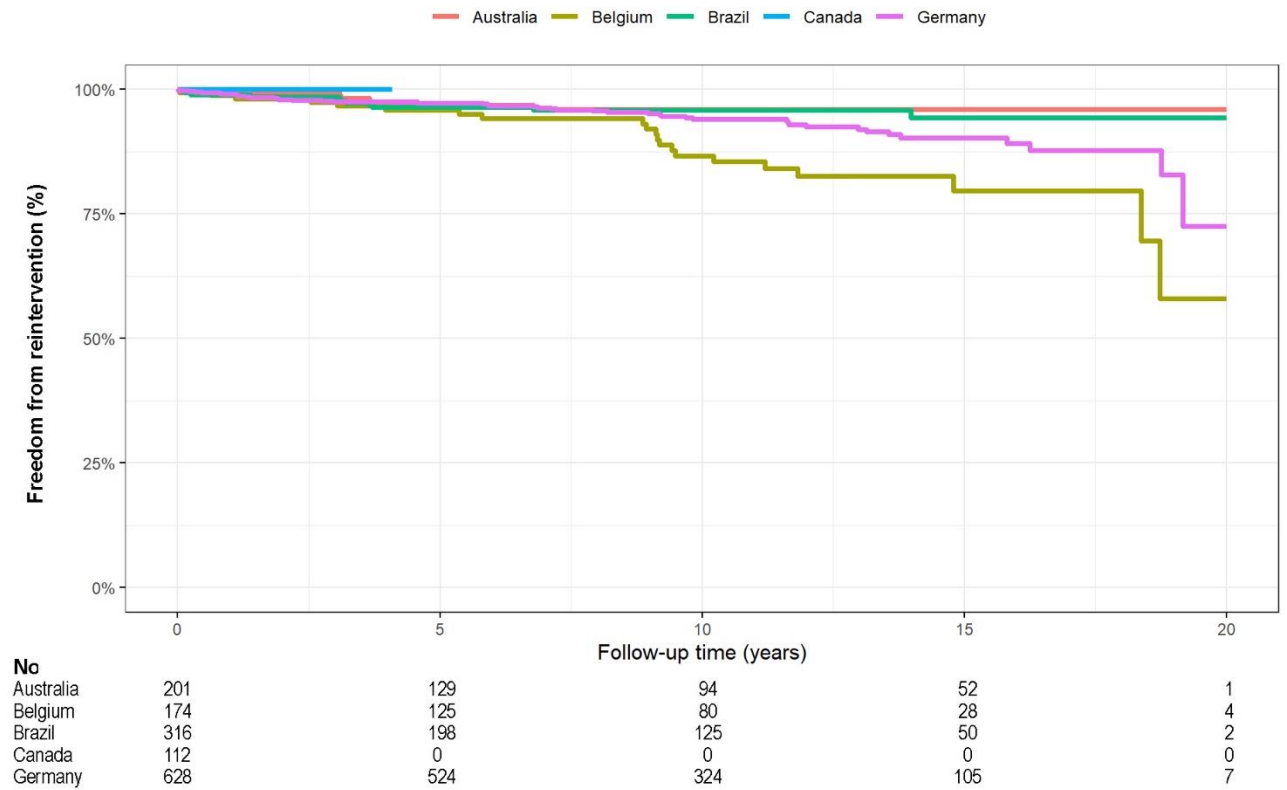

**Figure e2. Kaplan-Meier plots of autograft reintegration per country.**

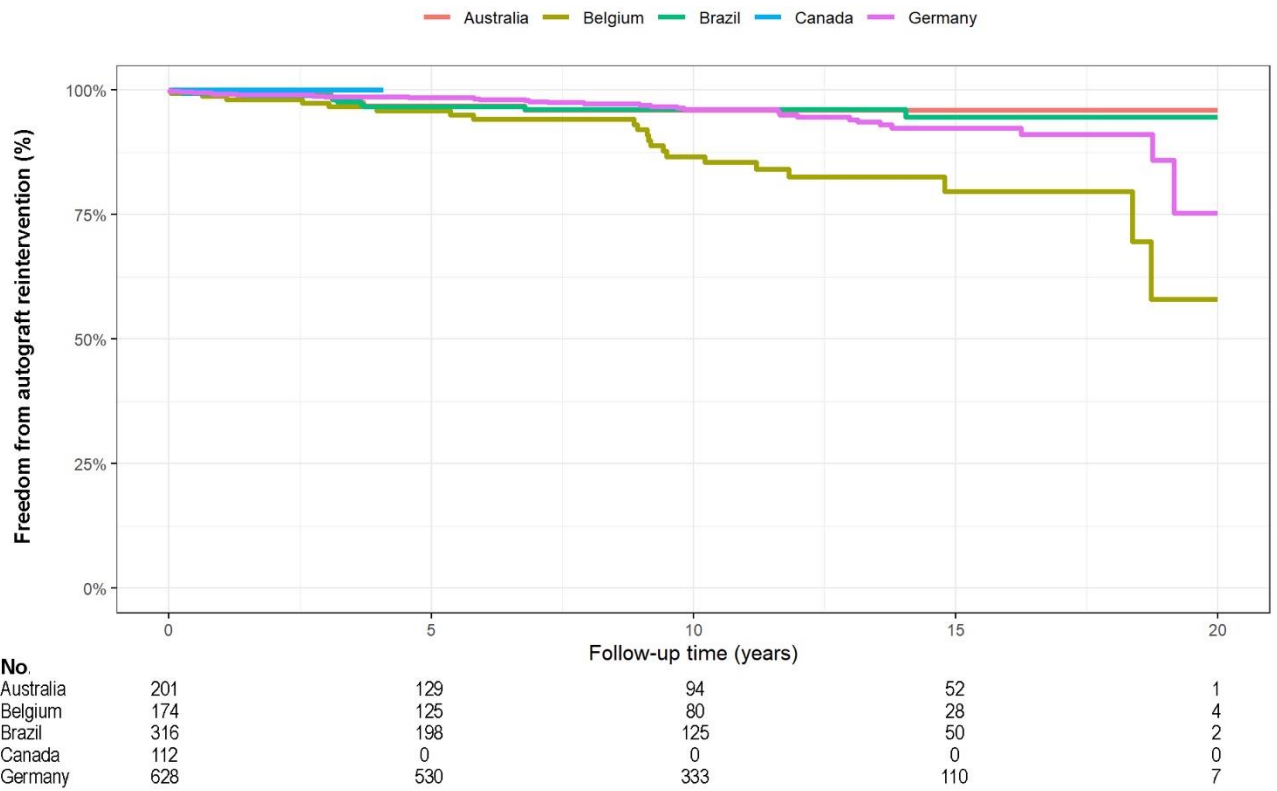

**Figure e3. Kaplan-Meier plots of homograft reintervention per country.**

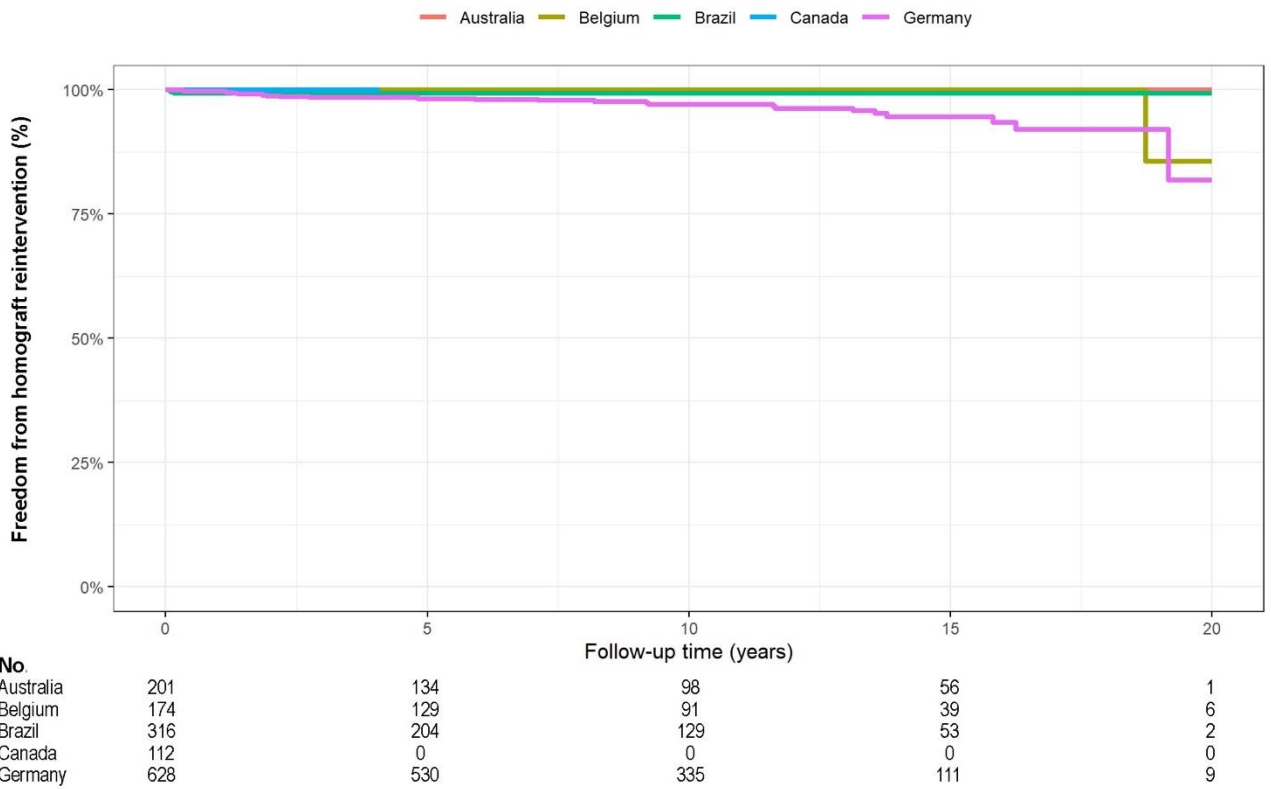

**Figure e4. Effect plots of Autograft gradient and homograft gradient.** Longitudinal evolution of the autograft peak gradient and homograft peak gradient in years after the Ross operation with 95% confidence interval as shaded area.

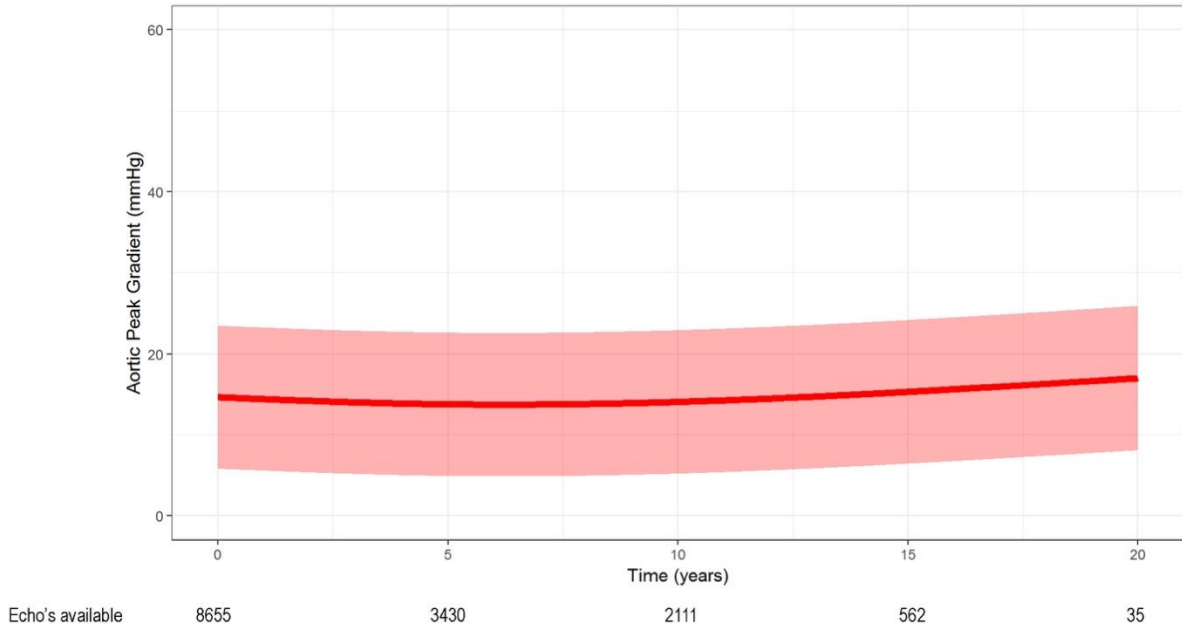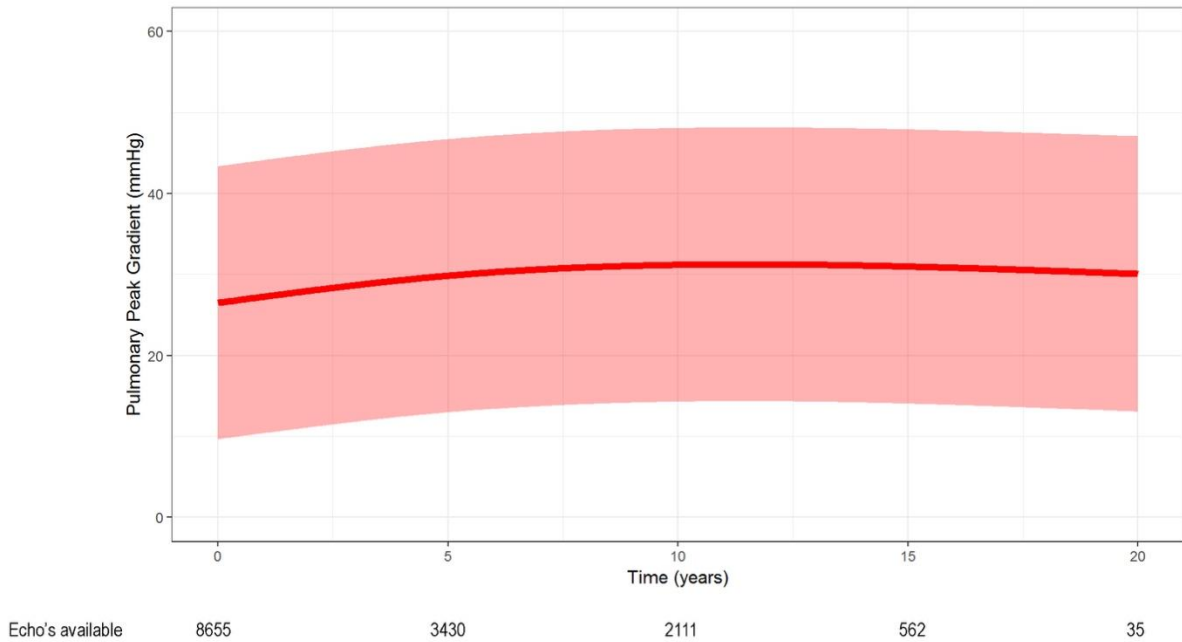

**Figure e5. Effect plot of Autograft regurgitation and homograft regurgitation.** Longitudinal evolution of the probability of each regurgitation grade of the autograft and homograft over time in a patient with median characteristics.

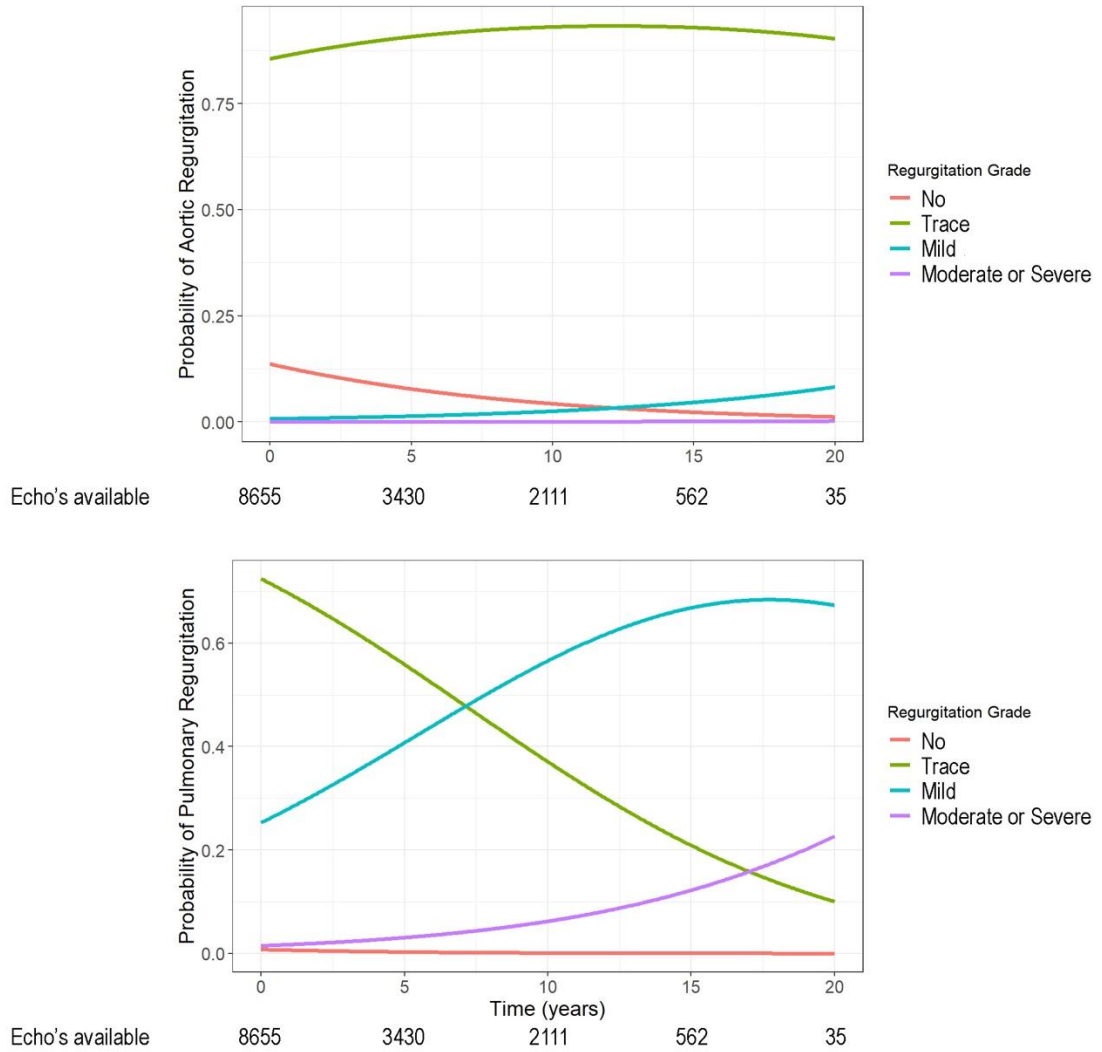



## **Appendix 1**

### **List of participating centers**

- Department of Cardiac Surgery, Santa Casa de Curitiba, Pontifícia Universidade Católica do Paraná, Curitiba, Paraná, Brazil
- Department of Cardiac and Thoracic Vascular Surgery, University of Lübeck, Lübeck, Germany
- Department of Cardiovascular Surgery, CHU Sainte Justine, Montreal, Canada, Montreal, QC, Canada
- Department of Cardiothoracic Surgery, Royal Melbourne Hospital, Melbourne, Victoria, Australia
- Department of Cardiovascular and Thoracic Surgery, Saint Luc University Clinic, Brussels, Belgium

## **Appendix 2**

### **In depth description of the statistical analysis**

#### **Mixed-effects models for the Aortic Peak Gradient and the Pulmonary Peak Gradient**

To analyze the repeated measurements of the aortic peak gradient and the pulmonary peak gradient, we used mixed-effects models. This type of models is appropriate for the analysis of repeated measurements over time as the within and between subject correlations are appropriately accounted for. To allow for non-linear subject-specific trajectories over time we used natural cubic splines with 1 knot placed at the median follow-up time, both for the fixed-effects and the random-effects structure of the models. Model assumptions were assessed using visual tools for the inspection of the residuals.

#### **Mixed-effects models for the Aortic and Pulmonary Regurgitation Grades**

To analyze the repeated measurements of the aortic and pulmonary regurgitation grades, we used continuation-ratio mixed-effects models. This type of models is appropriate for the analysis of ordinal outcomes over time. We assumed a linear evolution for the log-odds of regurgitation grade increase/decrease and we used a random-intercepts only model.

#### **Penalized Likelihood Multivariable Cox Regression**

For the analysis of the clinical endpoints we used multivariable Cox regression models. A penalized likelihood approach was used to account for the fact that the number of observed events was low relative to the numbers of candidate predictors considered. The ridge penalty was used for the penalization of the likelihood. The penalty parameter was selected using 10-fold cross-validation. The lambda with the lowest cross-validation error was then used. Multiple imputation (100 imputations) was used to account for missing covariate data and the results were subsequently pooled.
